# Supplementary material for: Automated noninvasive detection of idiopathic scoliosis in children and adolescents: A principle validation study
Source: Sci Rep. 2018 Dec 7;8:17714. doi: 10.1038/s41598-018-36360-w (PMC6286333; doi:10.1038/s41598-018-36360-w)
Supplement: Supplementary file 1 — Supplementary information [file 41598_2018_36360_MOESM1_ESM.doc]

**Automated noninvasive detection of idiopathic scoliosis in children and adolescents: A principle validation study**

Hideki Sudo1,2*, Terufumi Kokabu2*, Yuichiro Abe3, Akira Iwata2, Katsuhisa Yamada2, Yoichi M. Ito4, Norimasa Iwasaki2, and Satoshi Kanai5

1Department of Advanced Medicine for Spine and Spinal Cord Disorders, Faculty of Medicine and Graduate of Medicine, Hokkaido University, N15W7, Sapporo, Hokkaido 060-8638, Japan

2Department of Orthopaedic Surgery, Hokkaido University Hospital, N14W5, Sapporo, Hokkaido 060-8648, Japan

3Department of Orthopaedic Surgery, Eniwa Hospital, Koganechuo 2-1-1, Eniwa, Hokkaido 061-1449, Japan

4Department of Biostatistics, Hokkaido University Graduate School of Medicine, Sapporo, Hokkaido, Japan

5Division of Systems Science and Informatics, Hokkaido University Graduate School of Information Science and Technology, N14W9, Sapporo, Hokkaido 060-0814, Japan

*These authors contributed equally to this work.

Correspondence: Hideki Sudo, MD, PhD

Department of Advanced Medicine for Spine and Spinal Cord Disorders, Faculty of Medicine and Graduate of Medicine, Hokkaido University

N15W7, Sapporo, Hokkaido 060-8638, Japan

Tel: 81-11-706-5934 Fax: 81-11-706-6054

Email: [hidekisudo@yahoo.co.jp](mailto:hidekisudo@yahoo.co.jp)

**Supplementary figures**

**
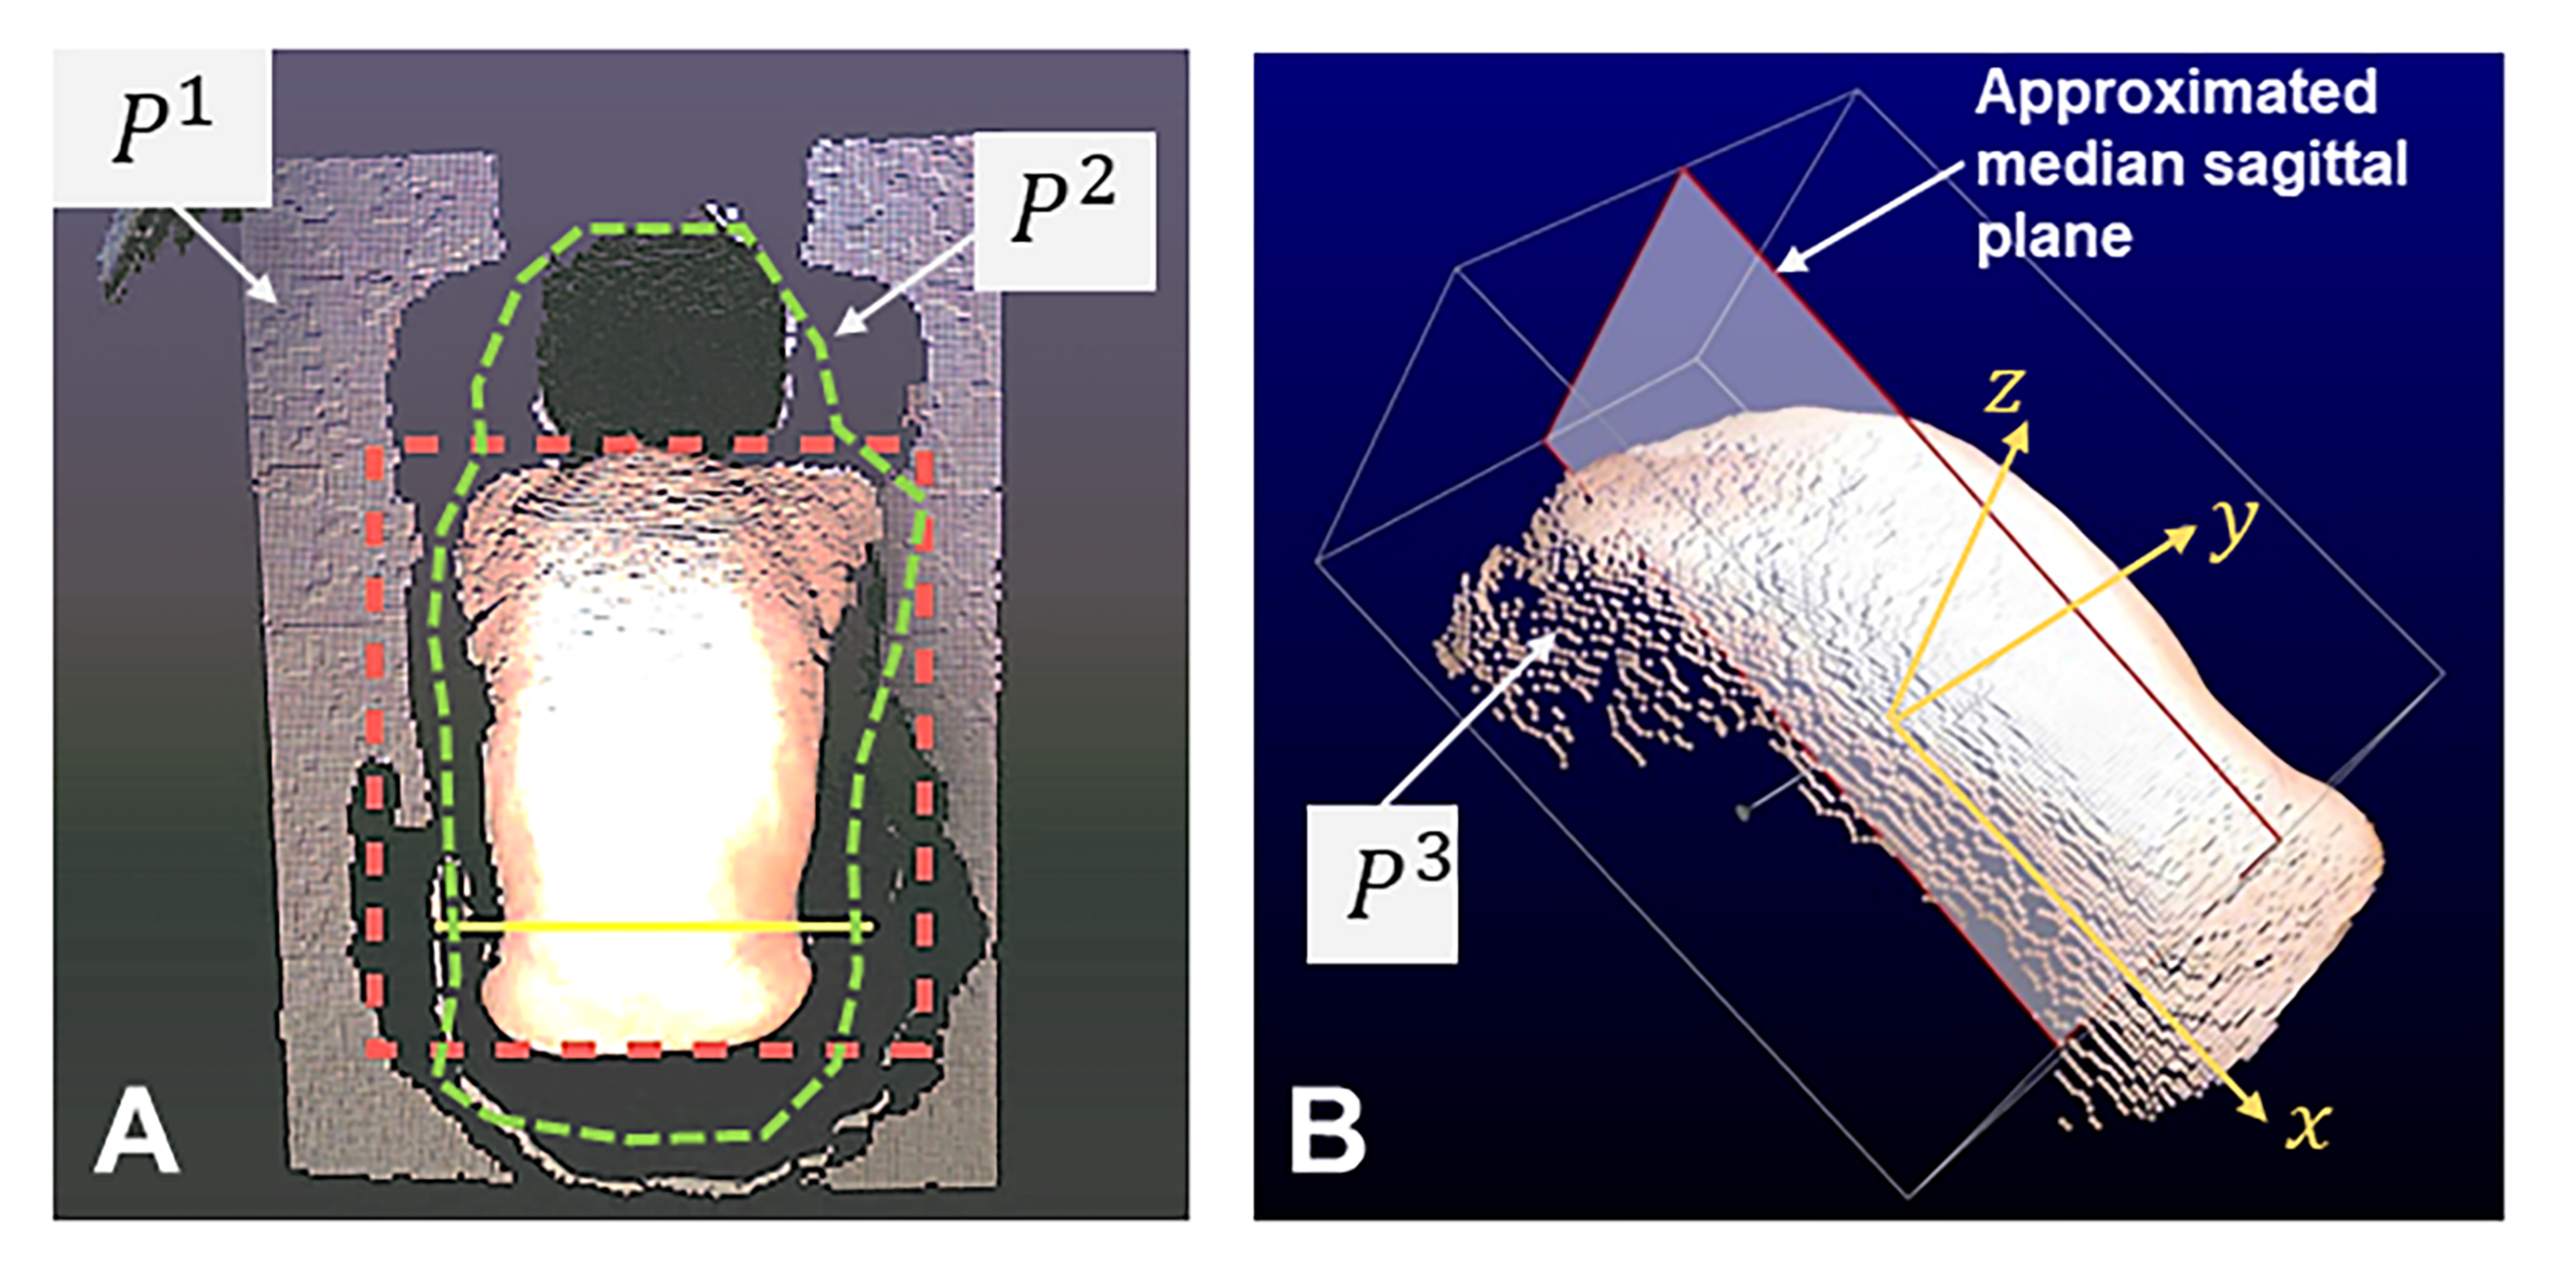
**

**Supplementary figure 1.** Capturing point clouds of a patient’s back, segmentation of the point cloud,andestimating an approximated median sagittal plane. **(A)** Original point cloud
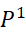
, and the point cloud including back, breech, neck and occipital surfaces
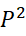
. **(B)** The pose-normalized point cloud
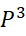
, and approximated median sagittal plane.


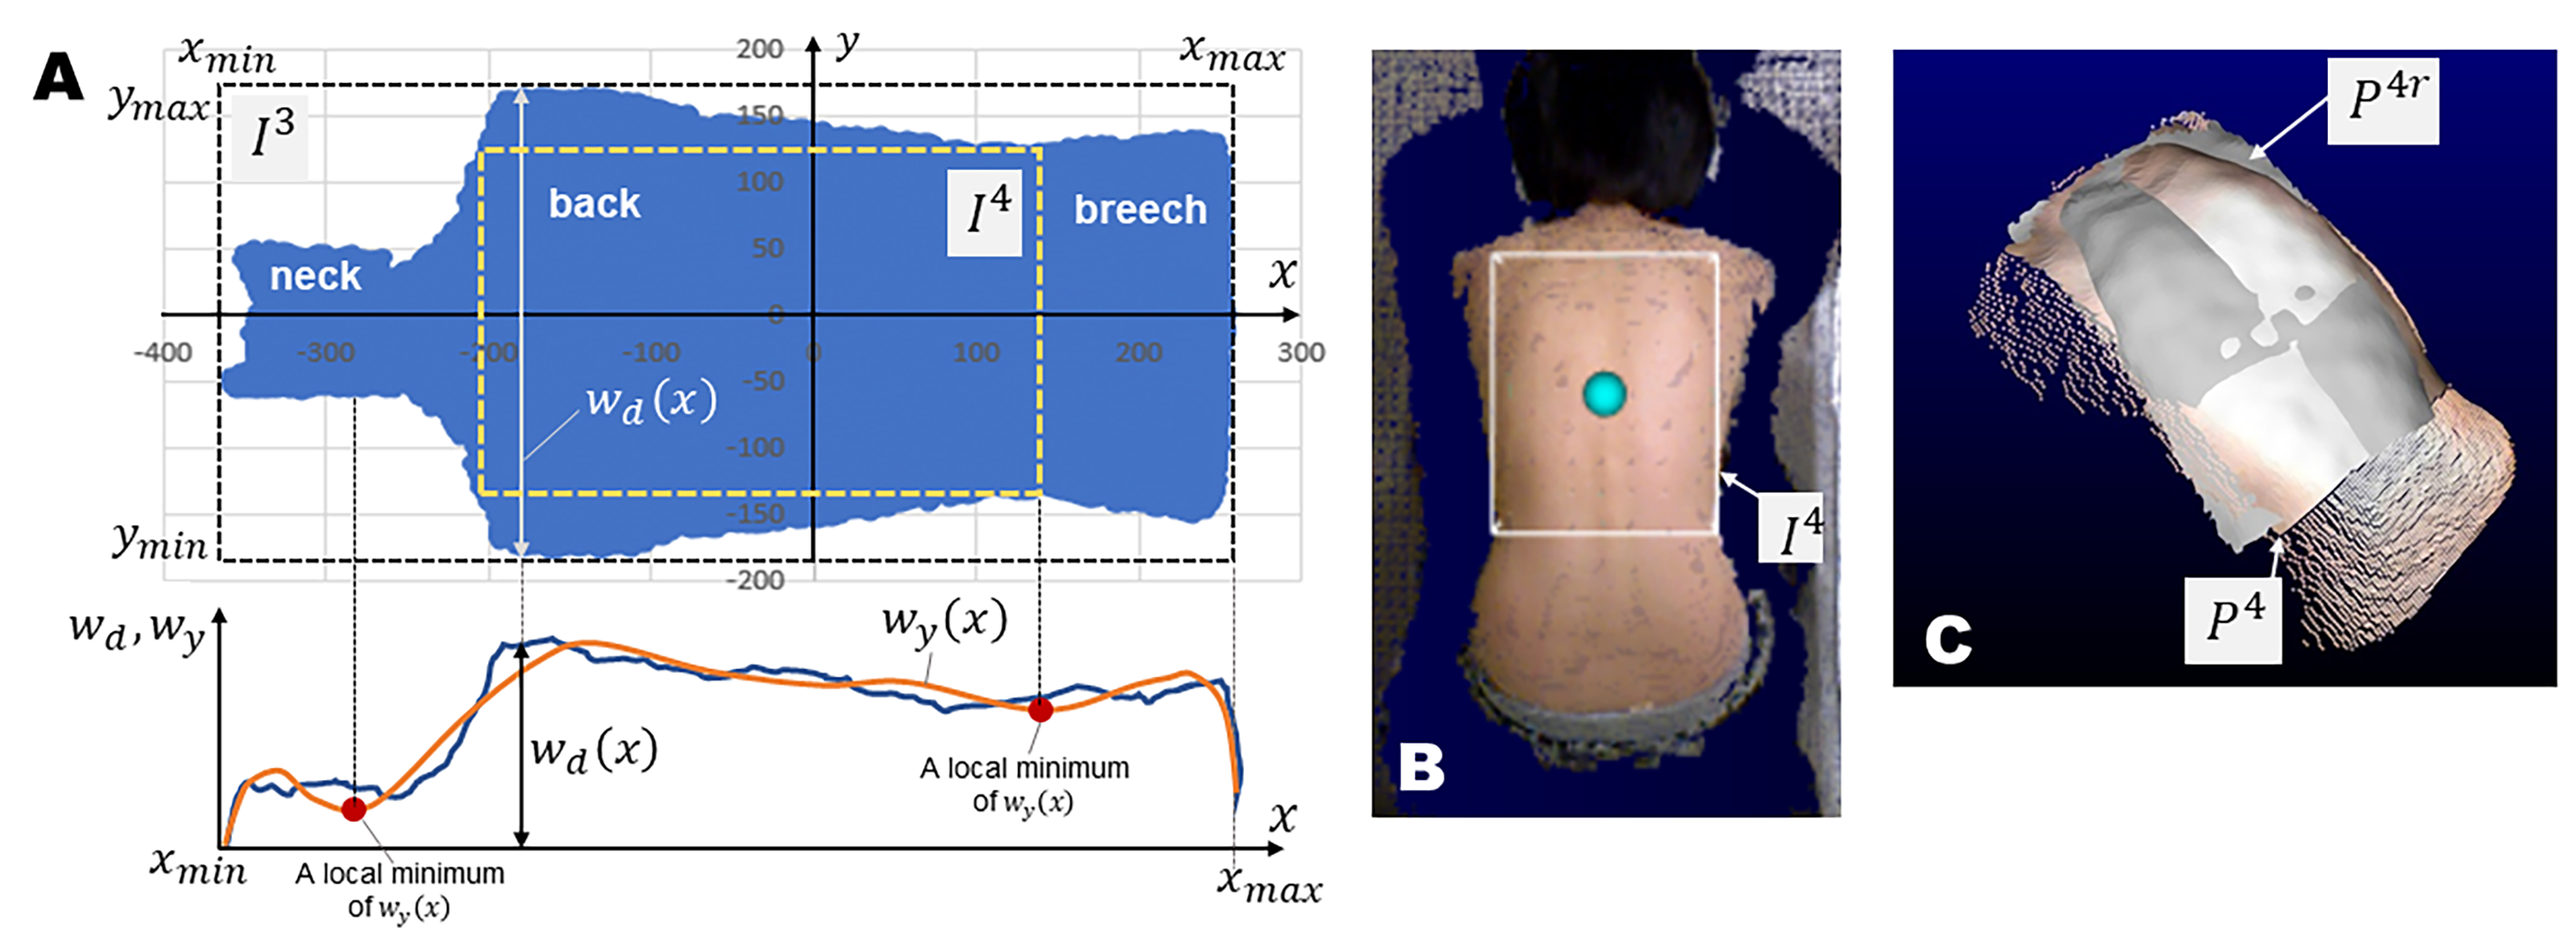


**Supplementary figure 2.** Estimating the boundaries of the surface of the back. **(A)** Estimating the boundaries of the surface of the back using binary image
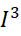
, discrete width function
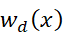
, a high-order polynomial of
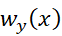
, local minima, and the identified rectangular region for analysis
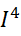
. **(B)** An example of the automatically identified rectangular region for analysis
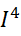
. **(C)** The point cloud for asymmetry analysis
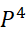
, and its reflected point cloud
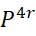
 about the approximated median sagittal plane.


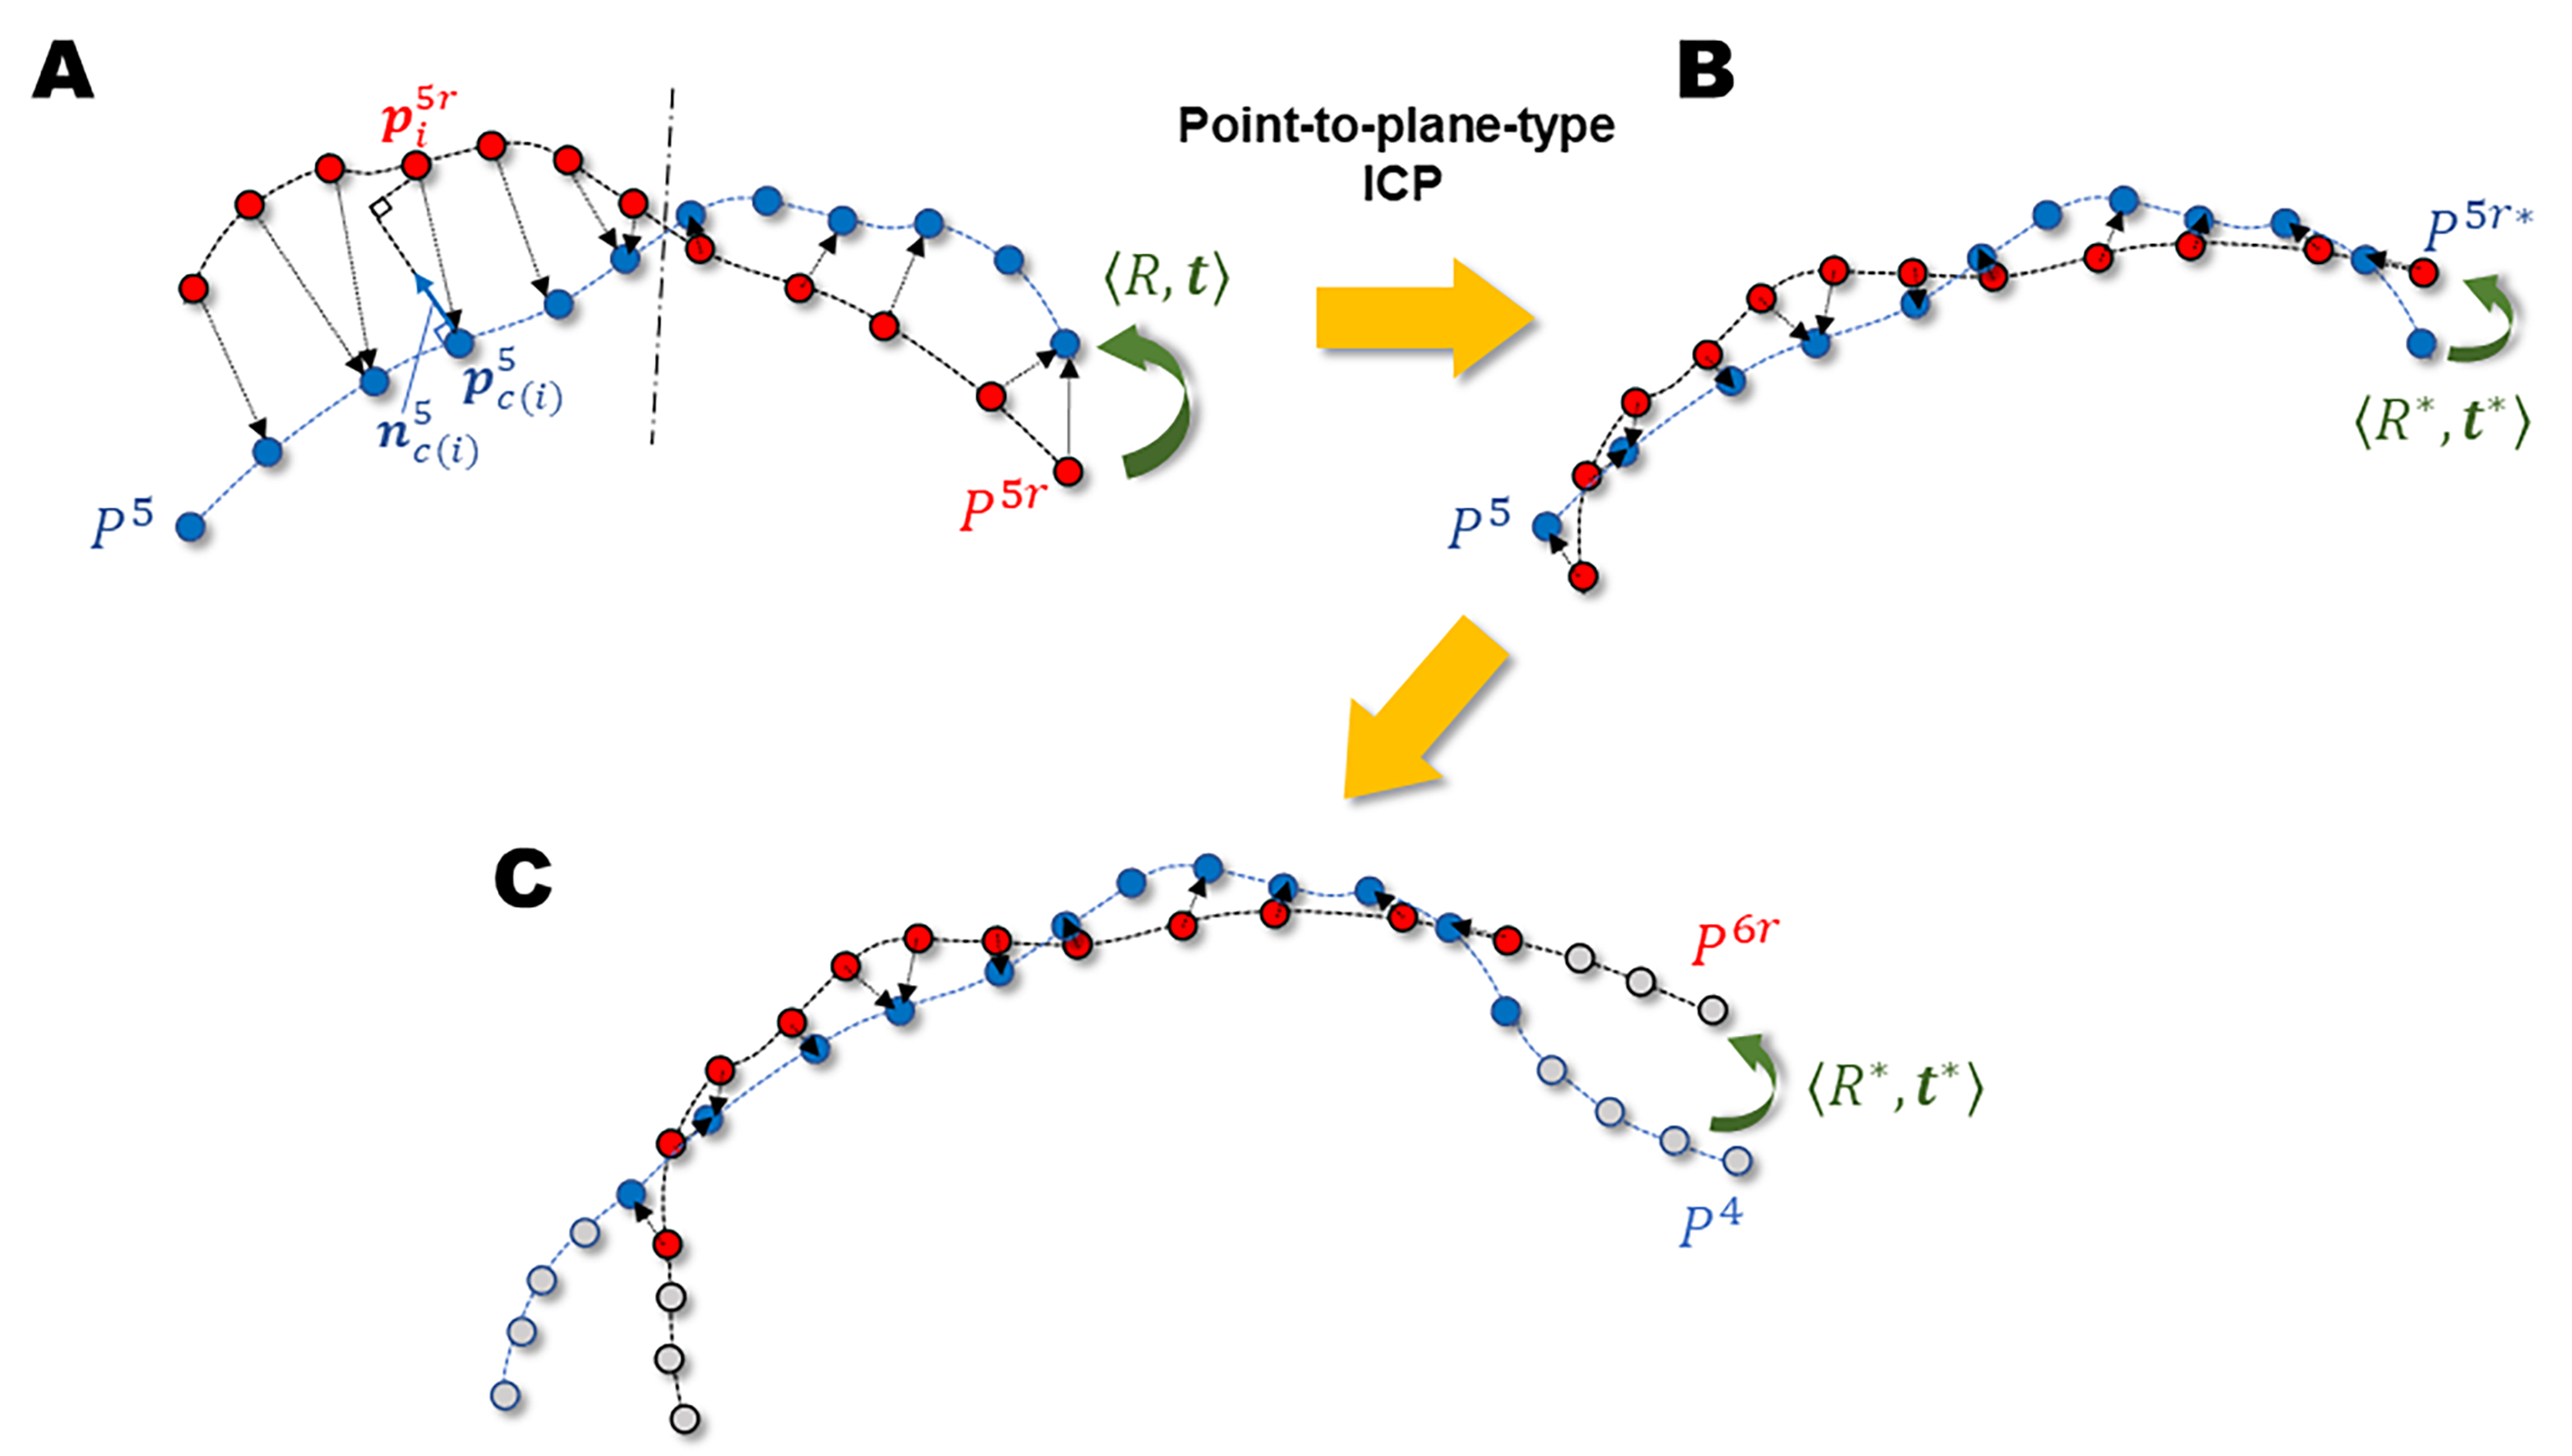


**Supplementary figure 3.** Finding the best fit between two point clouds using ICP. (A**)** Initial position and orientation of width-restricted point cloud
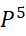
 and its reflected point cloud
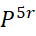
. **(B)** Point cloud
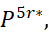
 which best fits
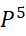
 under optimum rotation and translation
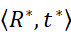
. **(C)** Optimum rotation and translation
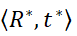
is applied to point cloud
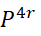
to provide the optimal reflected point cloud
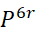
, which is fitted to the original point cloud
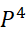
.


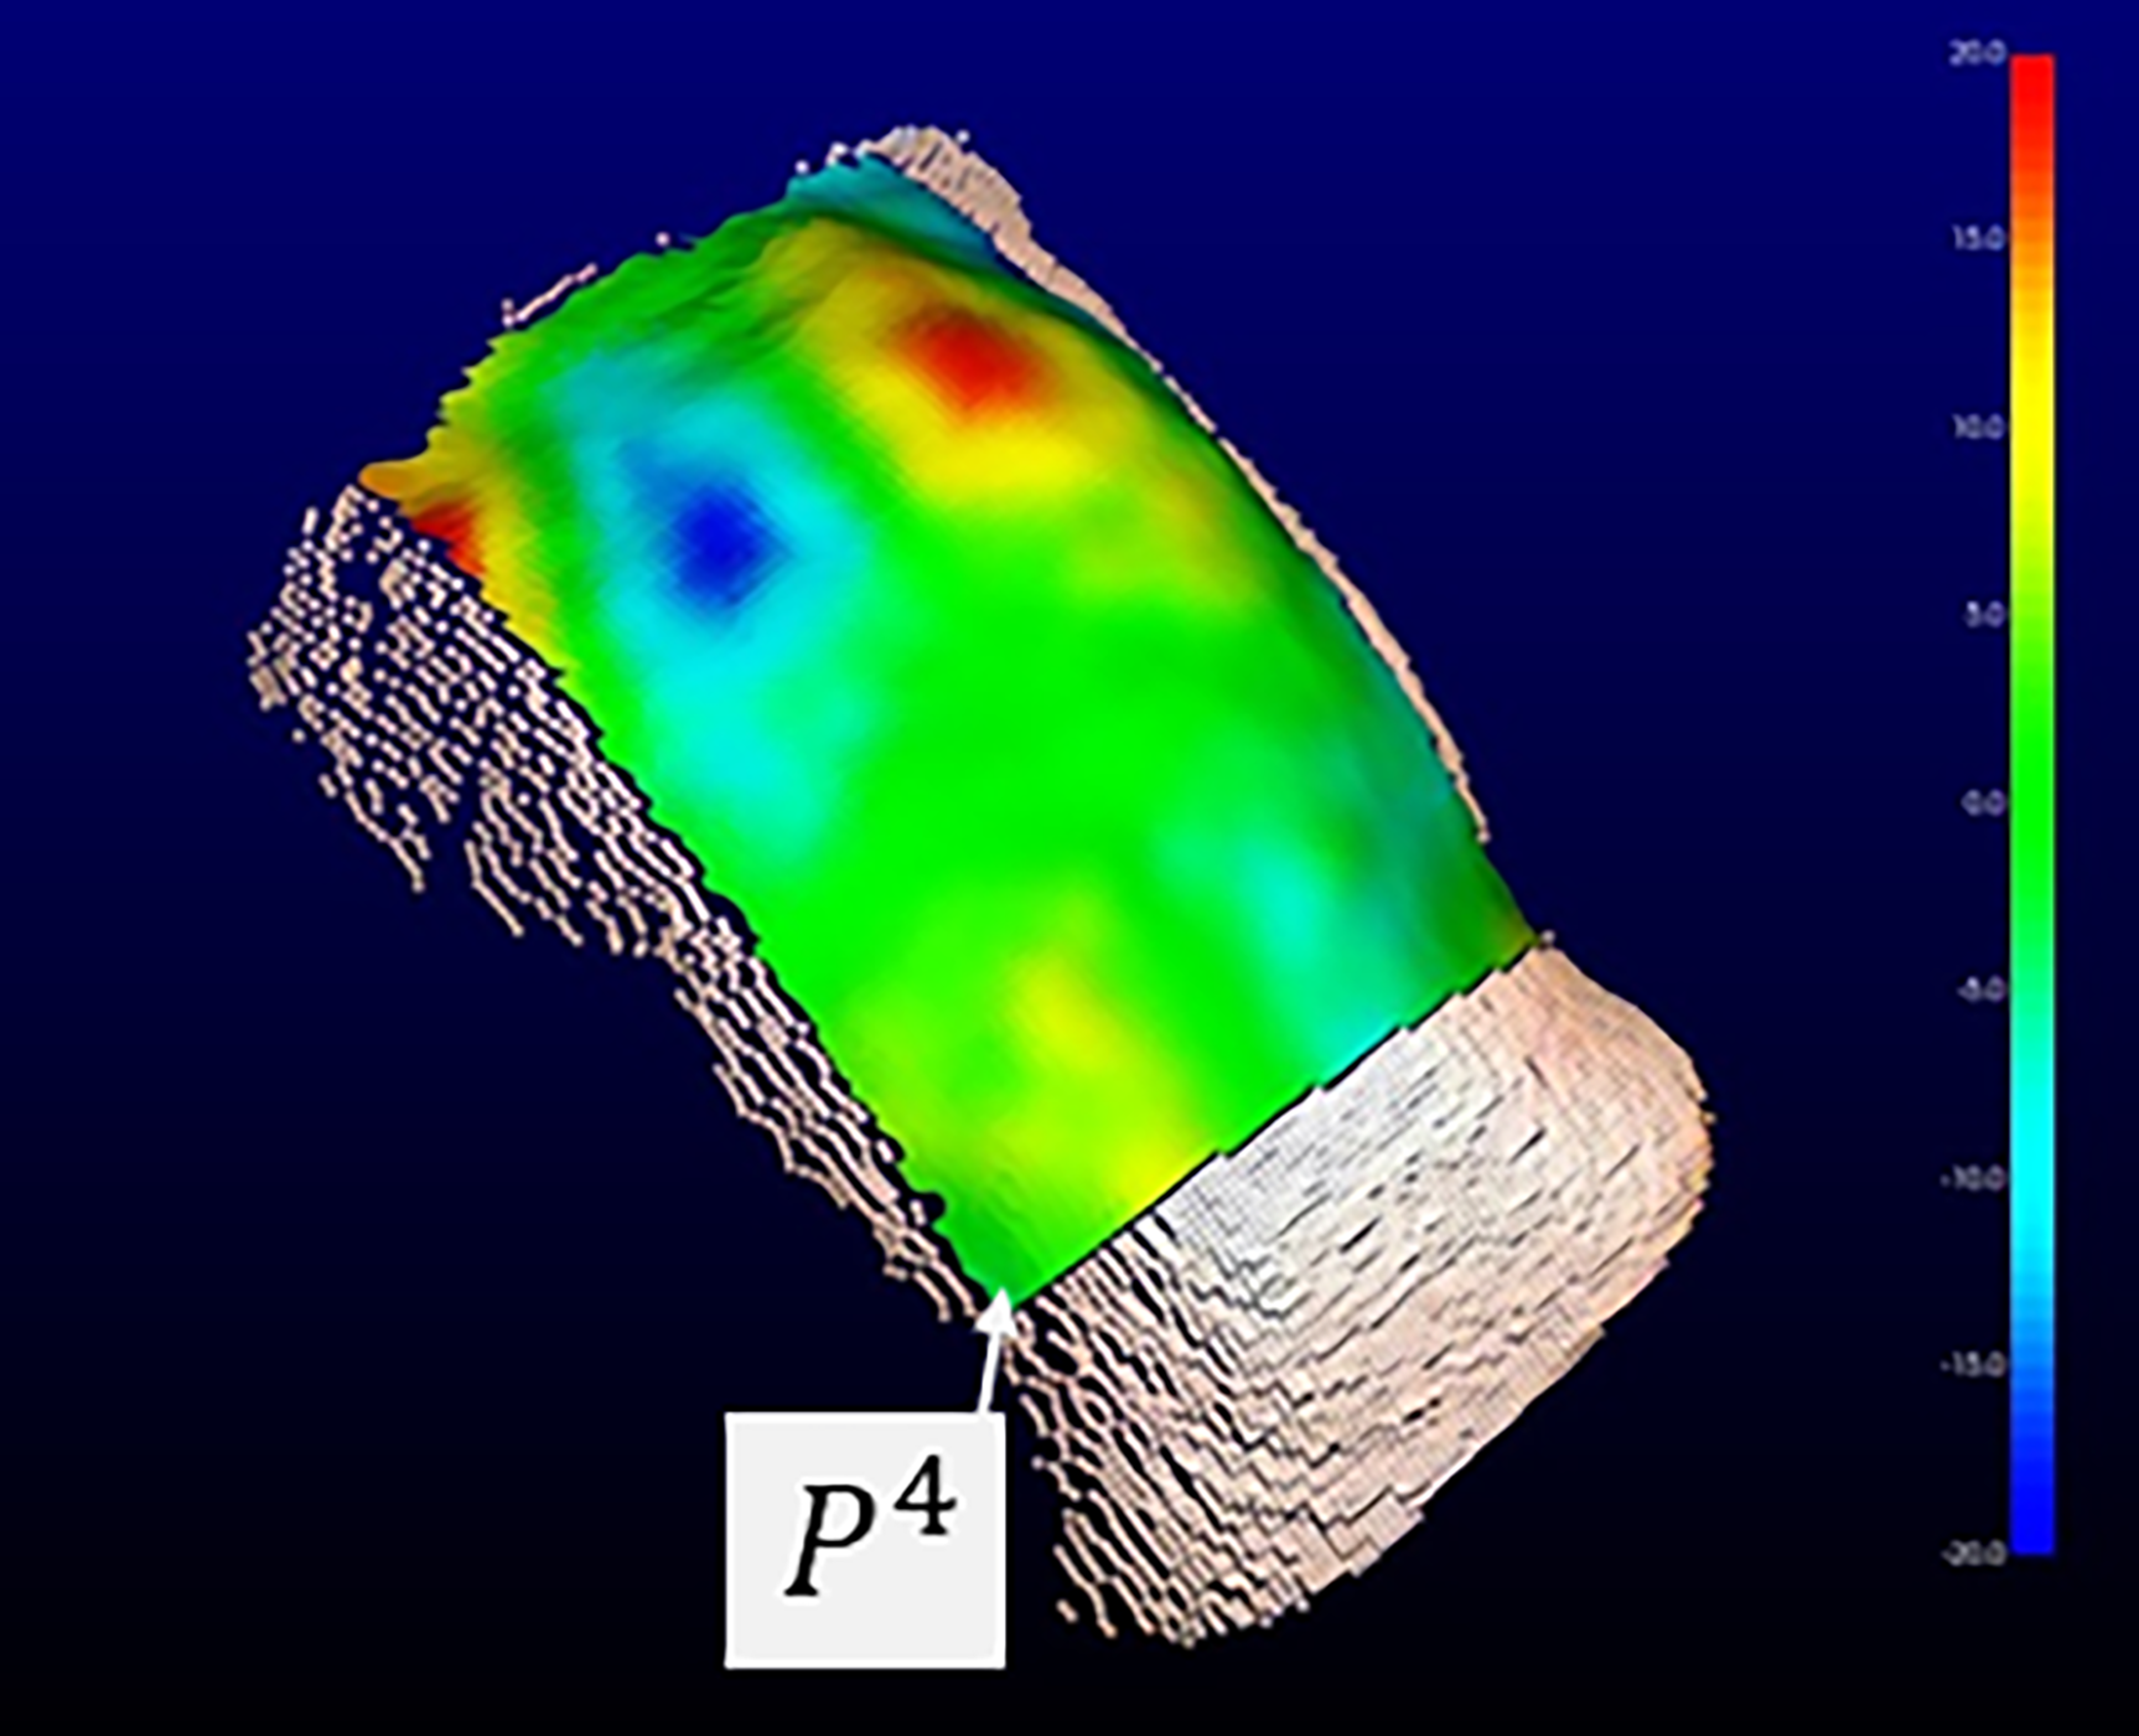


**Supplementary figure 4.** Colormap rendering of the deviation distribution
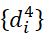
 between
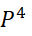
and
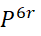
displayed on
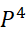
.


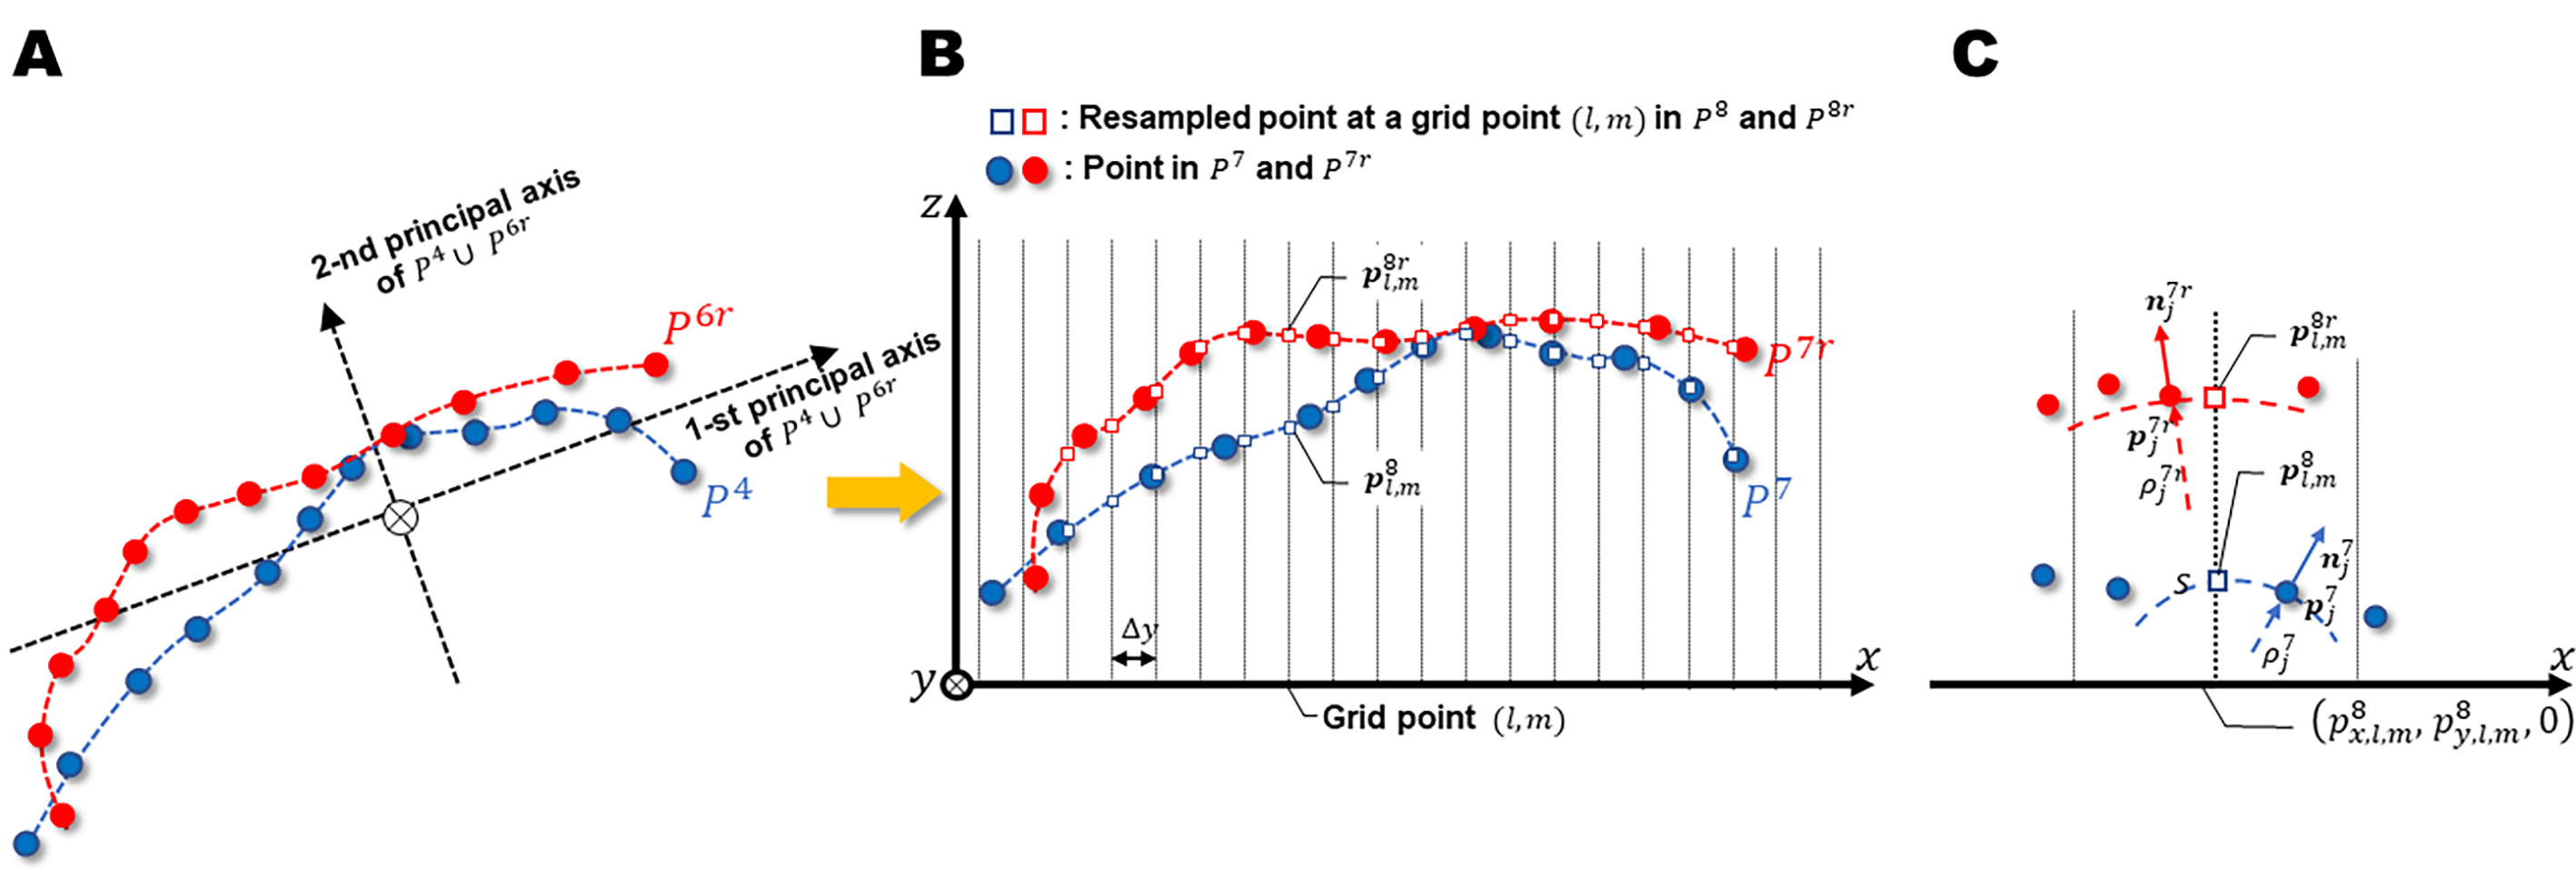


**Supplementary figure 5.** Precise extraction of deviations and estimation of the asymmetry index. **(A)** The orientation of
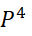
 and
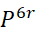
. **(B)** Resampling of point clouds
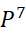
 and
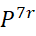
 at regular grid points. **(C)** Calculation of the resampled points
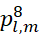
 and
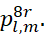


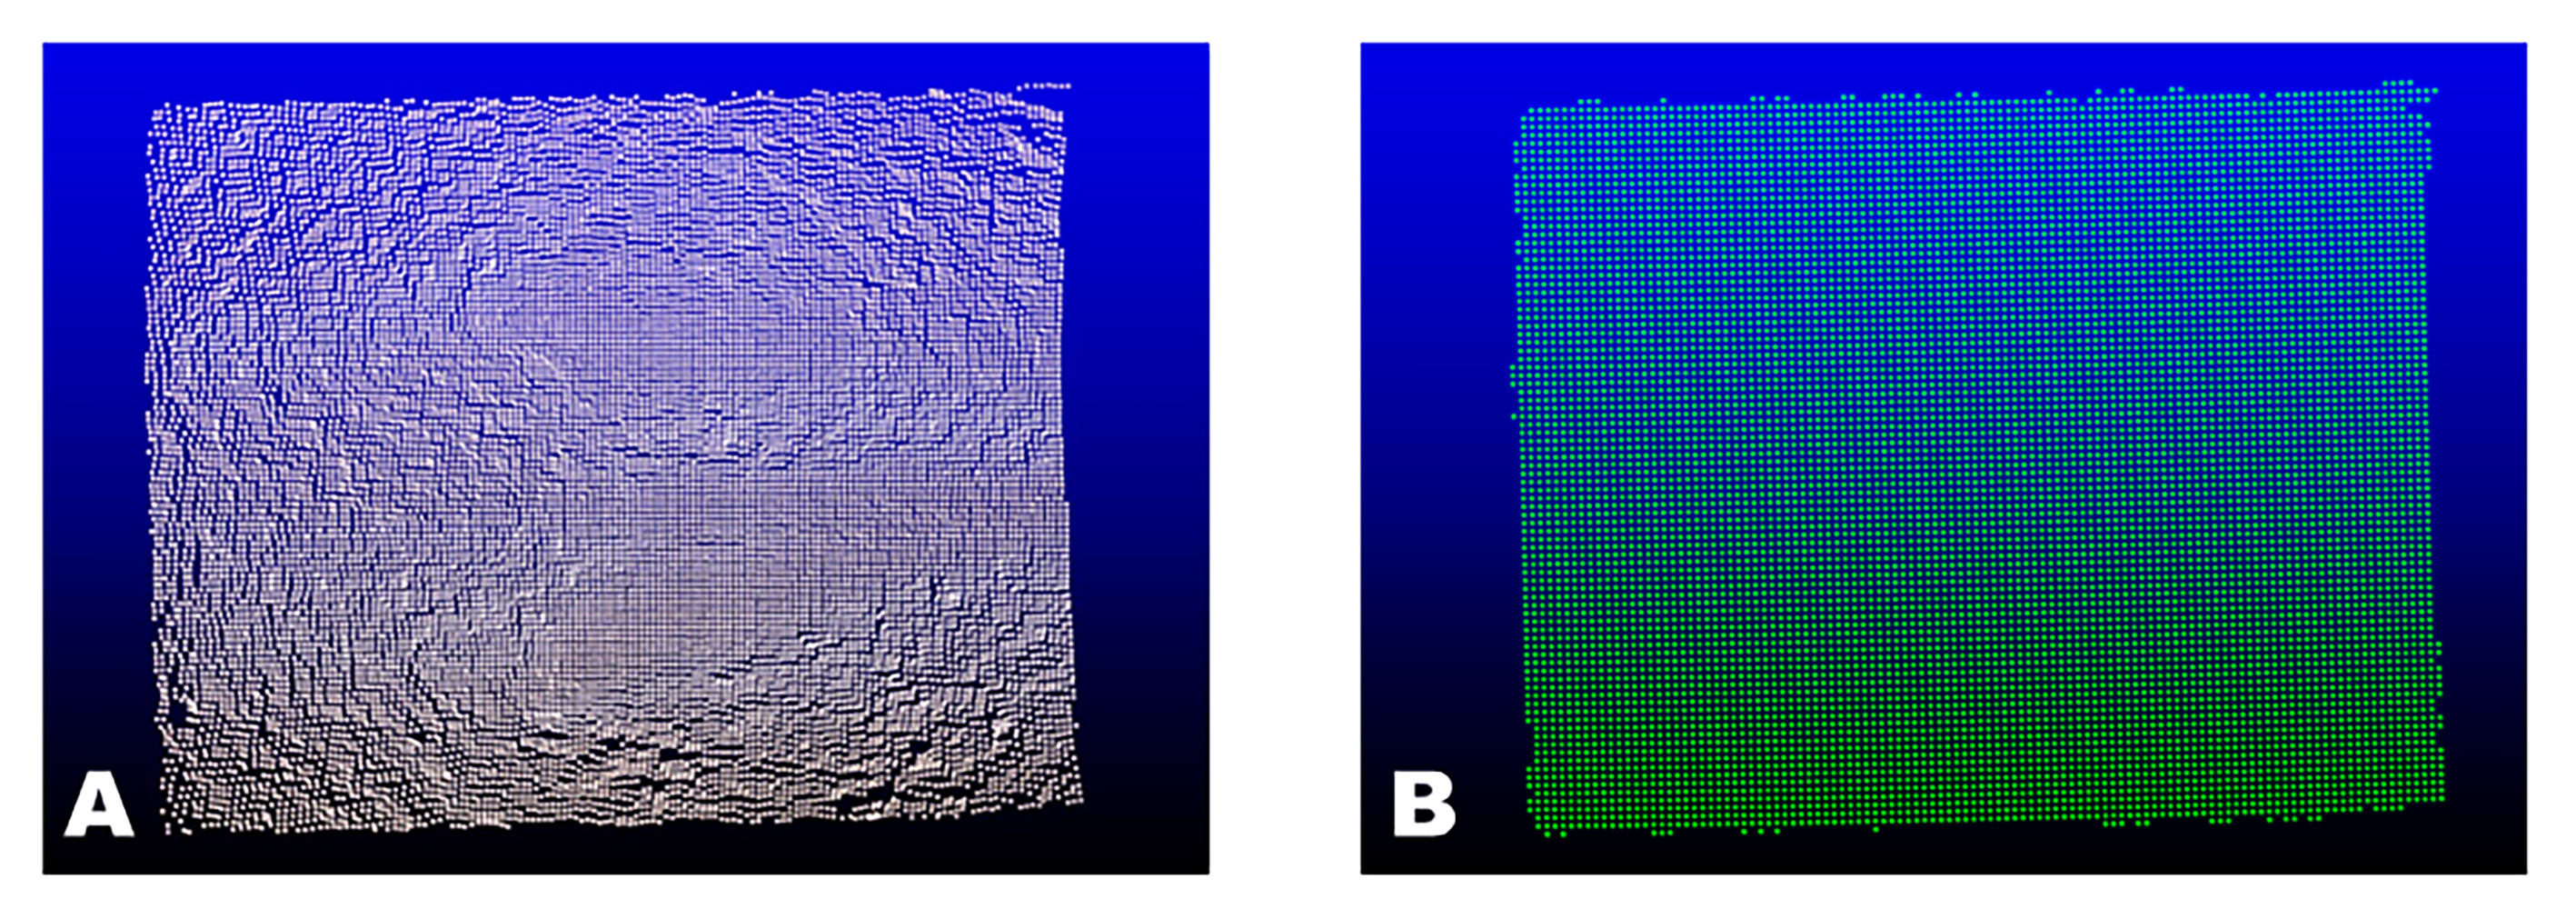


**Supplementary figure 6.** Points for the asymmetry index evaluation. **(A)** Point cloud
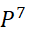
for asymmetry index evaluation before resampling. **(B)** The set of effective resampled points
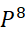
 at effective grid points for asymmetry index evaluation after resampling.


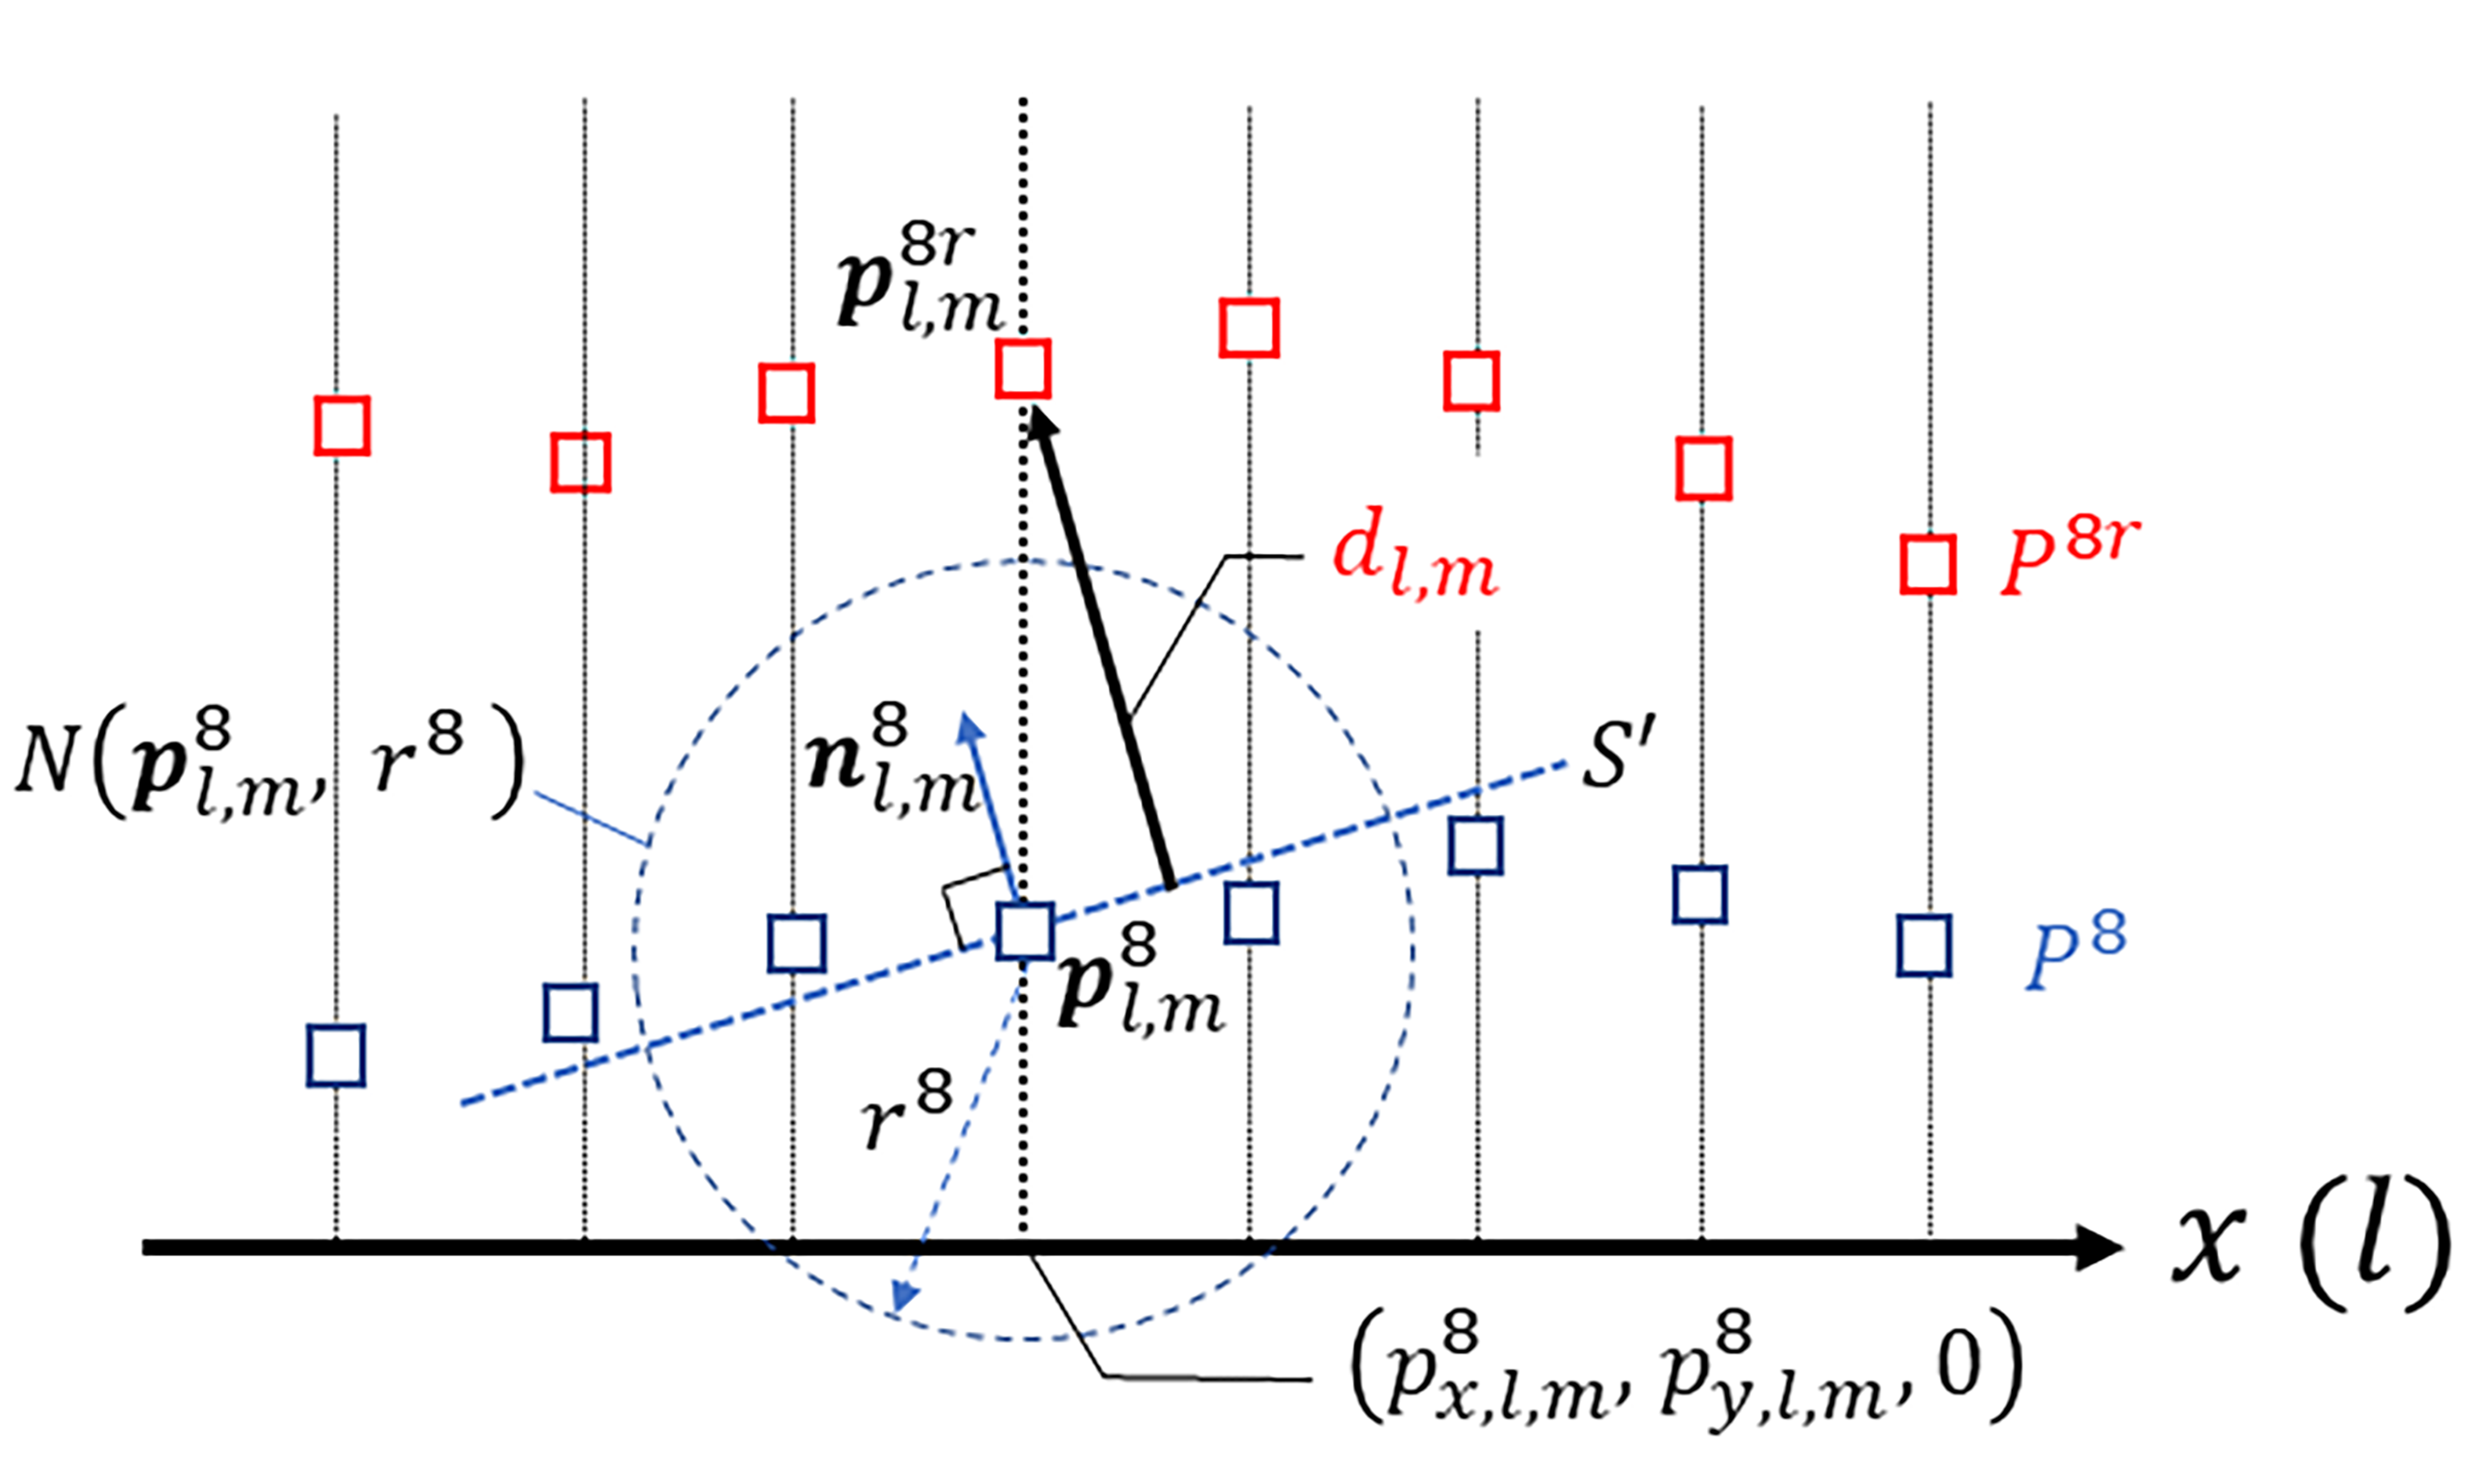


**Supplementary figure 7.** A new normal vector is estimated using principal component analysis of the neighboring point set.


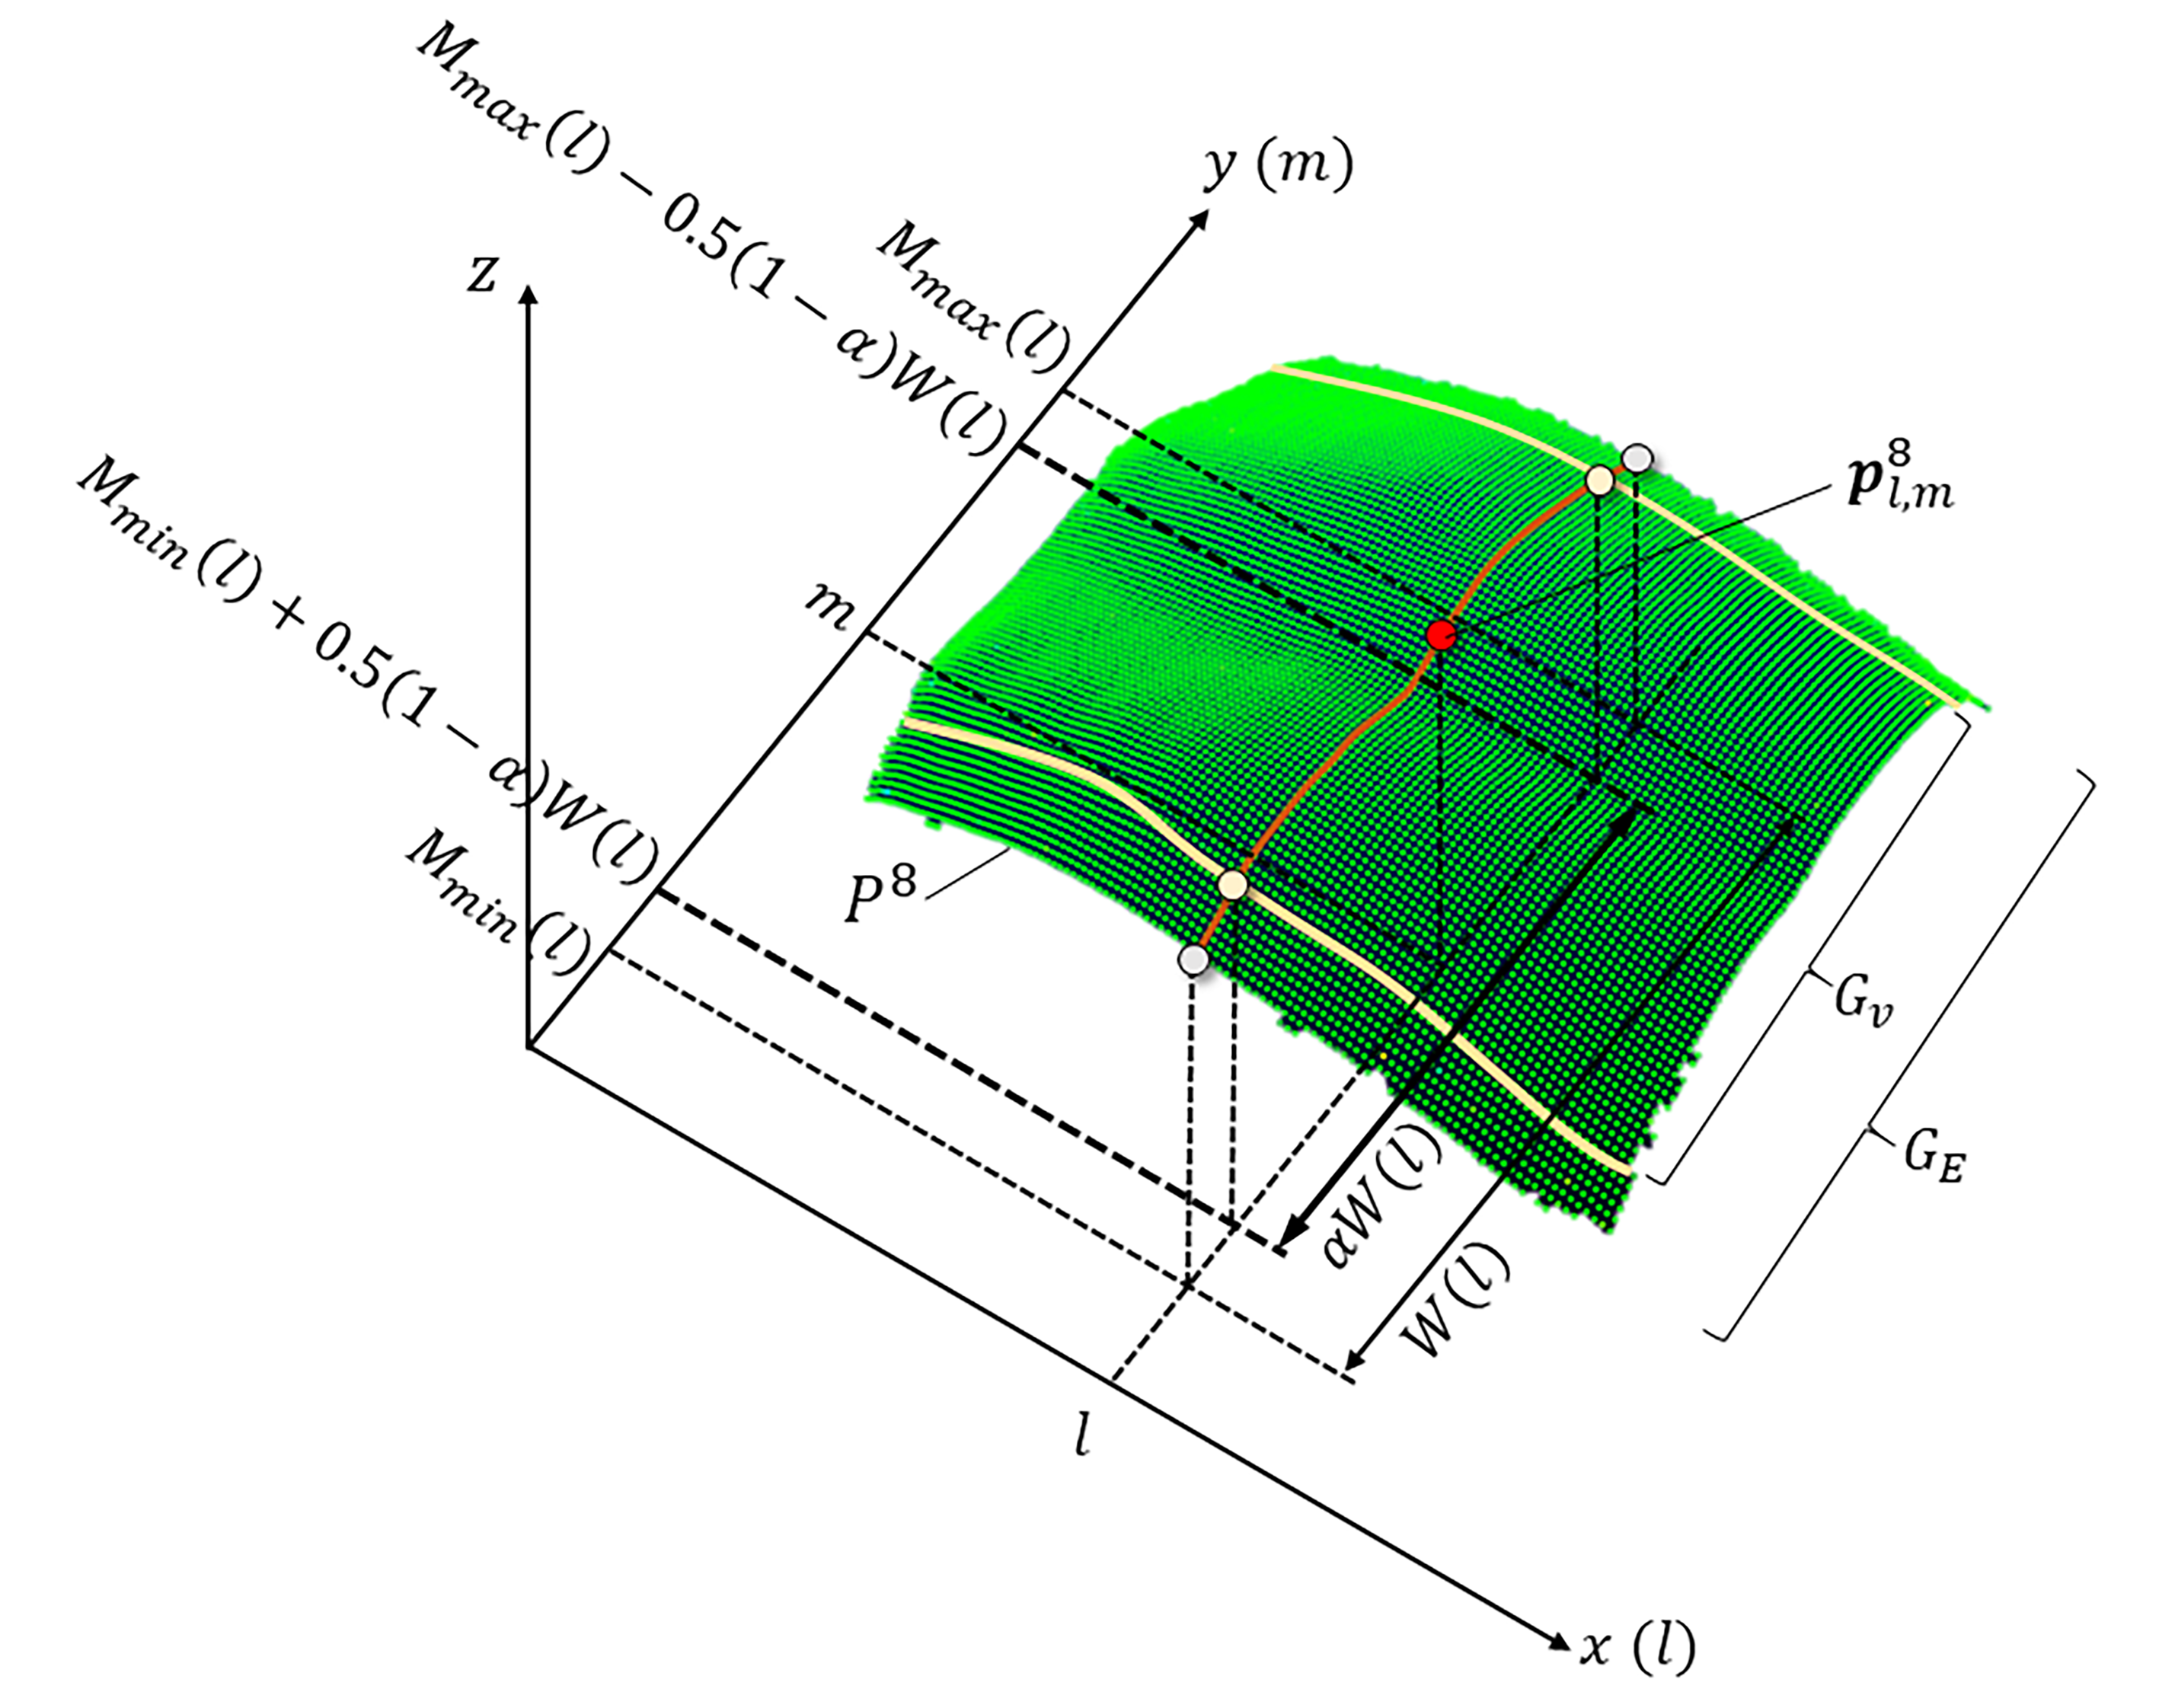


**Supplementary figure 8.** Grid point
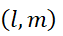
 is adopted as validonly if it lies in a valid range, such as
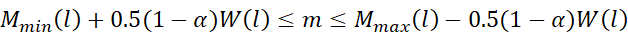
, where
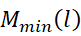
 and
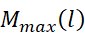
 are the minimum and maximum values of the *y* coordinate of the grid points at
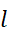
 included in
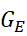
,
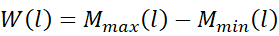
, and
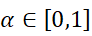
 is a parameter controlling the valid range.
